# Supplementary material for: Cell type-specific Nrf2 expression in multiple sclerosis lesions
Source: Springer Nature journal article supplement (doi:10.1007/s00401-015-1452-x), 2015-06-18
Supplement: MOESM1 [file 8404916]

## **Cell type-specific Nrf2 expression in MS lesions**

Acta Neuropathologica

Simon Licht-Mayer<sup>1</sup>, Isabella Wimmer<sup>1</sup>, Sarah Traffehn<sup>2</sup>, Imke Metz<sup>2</sup>, Wolfgang Brück<sup>2</sup>, Jan Bauer<sup>1</sup>,  
Monika Bradl<sup>1</sup>, Hans Lassmann<sup>1</sup>

1: Department of Neuroimmunology, Center for Brain Research, Medical University of Vienna,  
Austria

2: Institute of Neuropathology, University of Göttingen, Germany

All correspondence to:

Prof. Dr. Hans Lassmann

Center for Brain Research

Medical University of Vienna

Spitalgasse 4

A-1090 Wien

Tel.: +43 1 40160 34200

Fax.: +43 1 40160 934203

e-mail: [hans.lassmann@meduniwien.ac.at](mailto:hans.lassmann@meduniwien.ac.at)

**Supplementary Figure 1:**

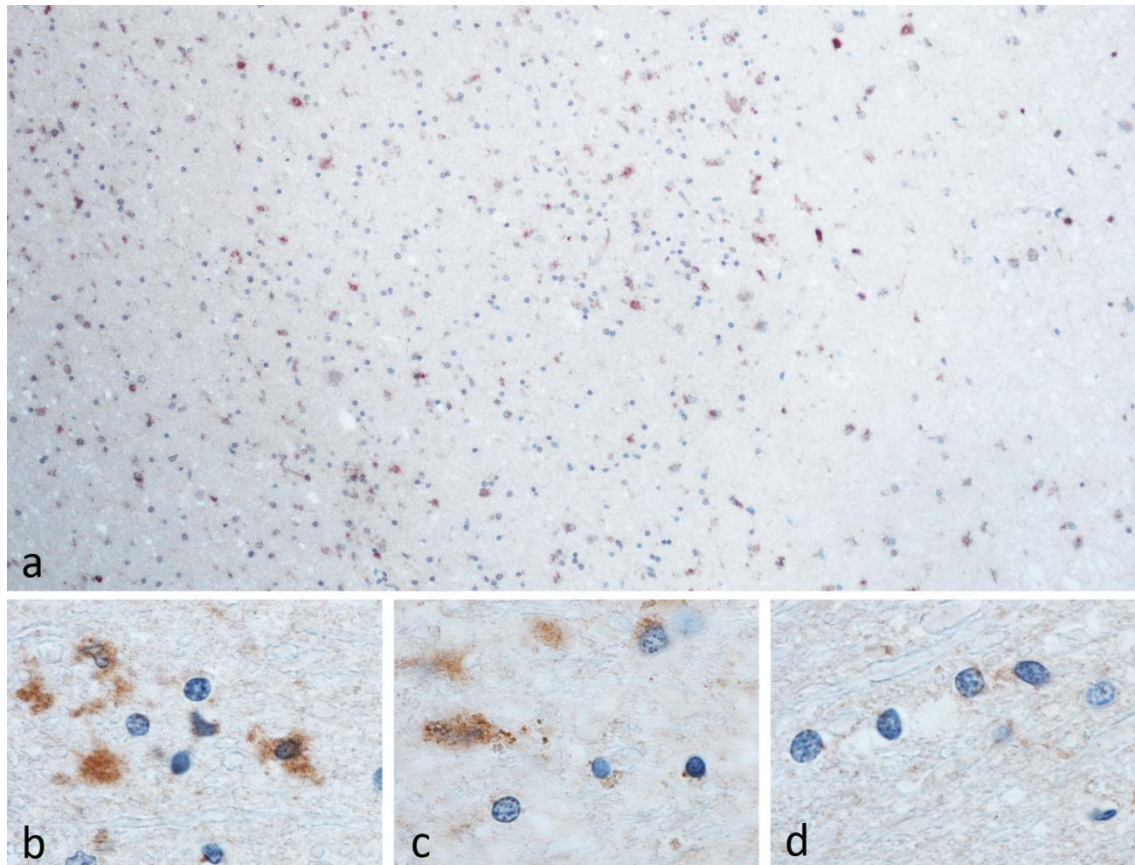

Slowly expanding (smoldering) lesion in primary progressive multiple sclerosis (MS21) stained for KEAP1 (immunohistochemistry). a) KEAP1 reactivity is seen in cells at the active lesion edge (left), while only few cells are present in the inactive lesion center (x 100); b-d) Higher magnification images from the same tissue sections showing immunoreactivity exclusively in the cytoplasm, but no reactivity within the nucleus. Reactivity is seen in different cells, including astrocytes (b) and oligodendrocytes and macrophages (c). In the normal appearing white matter, distant from active lesions immunoreactivity within cells is very low (d); x: 1000.

**Supplementary Table 1: Expression of Nrf2-responsive genes in multiple sclerosis**

|                                   | MS white matter |             |        |           | MS cortex   |        |              |                                                                                                                  |
|-----------------------------------|-----------------|-------------|--------|-----------|-------------|--------|--------------|------------------------------------------------------------------------------------------------------------------|
|                                   | Expression      | Fold-change |        |           | Fold-change |        |              |                                                                                                                  |
|                                   |                 | Control     | PPWM/C | Initial/C | Active/C    | MS/C   |              |                                                                                                                  |
| <b>Group 1</b>                    |                 |             |        |           |             |        |              |                                                                                                                  |
| <i>PGD</i> <sup>4</sup>           | 11.1            | -1.10       | 20.62  | -1.35     | -2.00       | -1.38  | NM_002631    | Phosphogluconate dehydrogenase                                                                                   |
| <i>GNAI2</i> <sup>9</sup>         | 6.0             | 2.27        | 12.60  | 3.25      | -1.32       | -1.67  | NM_002070    | Nucleotide binding protein (G protein), alpha inhibiting activity polypeptide 2, transcript variant 1            |
| <i>FTH1</i> <sup>1,2,4,9</sup>    | 8.8             | 1.45        | 6.04   | 1.41      | 1.40        | 2.23   | NM_002032    | Ferritin, heavy polypeptide 1                                                                                    |
| <i>ERP29</i> <sup>2</sup>         | 6.4             | 2.87        | 4.41   | 4.76      | -1.99       | -2.31  | NM_006817    | Endoplasmic reticulum protein 29, transcript variant 1                                                           |
| <i>TXN</i> <sup>1,2,7,9</sup>     | 7.2             | 1.60        | 4.02   | -1.23     | 7.09        | 17.71  | NM_003329    | Thioredoxin, transcript variant 1                                                                                |
| <i>ANKRD11</i> <sup>1</sup>       | 5.9             | 2.21        | 3.91   | 1.01      | -1.57       | -1.08  | NM_013275    | Ankyrin repeat domain 11                                                                                         |
| <i>GATA3</i> <sup>1</sup>         | 12.5            | 1.25        | 3.41   | 1.93      | -3.71       | -4.21  | NM_001002295 | GATA binding protein 3, transcript variant 1                                                                     |
| <i>FTL</i> <sup>1,2,4,9</sup>     | 4.2             | 5.02        | 3.34   | 3.47      | -1.07       | 1.29   | NM_000146    | Ferritin, light polypeptide                                                                                      |
| <i>HBG1</i> <sup>1</sup>          | 5.4             | 1.26        | 3.10   | 2.48      | -1.04       | -1.67  | NM_000559    | Hemoglobin, gamma A                                                                                              |
| <i>BACH1</i> <sup>6</sup>         | 4.1             | -1.11       | 2.64   | -1.02     | -1.66       | -2.25  | NM_206866    | BTB and CNC homology 1, basic leucine zipper transcription factor 1, transcript variant 1                        |
| <i>PPARG</i> <sup>1</sup>         | 7.9             | -1.14       | 2.29   | -1.04     | -1.18       | -1.40  | NM_138711    | Peroxisome proliferator-activated receptor gamma, transcript variant 3                                           |
| <i>GCS</i> <sup>5</sup>           | 5.0             | 1.01        | 2.10   | 1.75      | -1.05       | -1.15  | M90656       | Gamma-glutamylcysteine synthetase                                                                                |
| <i>PRDX1</i> <sup>1,2,4,7</sup>   | 10.4            | -1.12       | 2.06   | 1.43      | -2.52       | -3.03  | NM_002574    | Peroxioredoxin 1, transcript variant 1                                                                           |
| <i>UNKL</i> <sup>1</sup>          | 10.0            | 4.00        | 1.96   | 1.42      | -1.52       | -1.35  | NM_001037125 | Unkempt homolog (Drosophila)-like, transcript variant 2                                                          |
| <i>USP14</i> <sup>2,7</sup>       | 4.1             | 1.38        | 1.93   | 1.20      | -1.68       | -1.43  | NM_005151    | Ubiquitin specific peptidase 14 (tRNA-guanine transglycosylase), transcript variant 1                            |
| <i>TALDO1</i> <sup>1</sup>        | 7.5             | -1.68       | 1.72   | -1.00     | 2.75        | 3.07   | NM_006755    | Transaldolase 1                                                                                                  |
| <i>FECH</i> <sup>1</sup>          | 6.3             | 1.02        | 1.71   | 1.47      | 1.78        | 1.70   | NM_001012515 | Ferrochelatase (FECH), transcript variant 1                                                                      |
| <i>AMBP</i> <sup>1</sup>          | 5.0             | 4.59        | 1.37   | 1.55      | -2.82       | -2.86  | NM_001633    | Alpha-1-microglobulin/bikunin precursor                                                                          |
| <b>Group 2</b>                    |                 |             |        |           |             |        |              |                                                                                                                  |
| <i>TXNRD2</i> <sup>3</sup>        | 18.9            | 1.88        | 5.85   | 1.17      | -1.53       | -1.96  | NM_006440    | Thioredoxin reductase 2                                                                                          |
| <i>CCT7</i> <sup>2</sup>          | 18.1            | 3.70        | 5.45   | 14.30     | -5.54       | -2.98  | NM_006429    | Chaperonin containing TCP1, subunit 7 (eta), transcript variant 1                                                |
| <i>OSGIN1</i> <sup>1</sup>        | 14.8            | -1.42       | 5.32   | -1.19     | -1.04       | -1.15  | NM_182981    | Oxidative stress induced growth inhibitor 1                                                                      |
| <i>GNPDA1</i> <sup>1</sup>        | 28.1            | 6.61        | 5.10   | 3.83      | -3.69       | -4.46  | NM_005471    | Glucosamine-6-phosphate deaminase 1                                                                              |
| <i>HMOX1</i> <sup>1,2,4,7,9</sup> | 1689.4          | -2.44       | 3.85   | 2.17      | 129.23      | 254.91 | NM_002133    | Heme oxygenase (decycling) 1                                                                                     |
| <i>BMP10</i> <sup>1</sup>         | 22.6            | 2.64        | 2.70   | -1.15     | -1.09       | -1.70  | NM_014482    | Bone morphogenetic protein 10                                                                                    |
| <i>GSTP1</i> <sup>1,4,9</sup>     | 22441.9         | -4.92       | 2.40   | 1.78      | 4.09        | 4.54   | NM_000852    | Glutathione S-transferase pi 1                                                                                   |
| <i>SLC3A2</i> <sup>1</sup>        | 124.2           | -12.69      | 2.34   | 2.77      | 2.96        | 3.54   | NM_001012662 | Solute carrier family 3 (activators of dibasic and neutral amino acid transport), member 2, transcript variant 2 |
| <i>MT2A</i> <sup>1</sup>          | 201.9           | -9.27       | 2.16   | 1.83      | 7.82        | 16.38  | NM_005953    | Metallothionein 2A                                                                                               |
| <i>ALDH2</i> <sup>10</sup>        | 14.6            | -1.86       | 2.05   | 1.53      | 1.11        | 1.39   | NM_000690    | Aldehyde dehydrogenase 2 family (mitochondrial), transcript variant 1                                            |
| <i>CYP1A1</i> <sup>2</sup>        | 28.7            | 1.17        | 1.76   | 1.64      | -1.61       | -1.51  | NM_000499    | Cytochrome P450, family 1, subfamily A, polypeptide 1                                                            |
| <i>SOD3</i> <sup>2</sup>          | 71.0            | -1.96       | 1.63   | -1.01     | 3.08        | 8.01   | NM_003102    | Superoxide dismutase 3, extracellular                                                                            |

|                                |       |        |       |       |       |        |              |                                                                                                                      |
|--------------------------------|-------|--------|-------|-------|-------|--------|--------------|----------------------------------------------------------------------------------------------------------------------|
| <i>KIFC3</i> <sup>1</sup>      | 167.0 | 1.69   | 1.57  | 1.70  | -1.87 | -1.44  | NM_005550    | Kinesin family member C3, transcript variant 1                                                                       |
| <i>VCP</i> <sup>2</sup>        | 23.1  | 1.05   | 1.43  | 1.08  | 2.07  | 3.41   | NM_007126    | Valosin containing protein                                                                                           |
| <i>MAFG</i> <sup>1,7,9</sup>   | 181.2 | 1.73   | 1.28  | 1.01  | -1.24 | -1.13  | NM_002359    | V-maf musculoaponeurotic fibrosarcoma oncogene homolog G (avian), transcript variant 1                               |
| <i>ME1</i> <sup>1,4,10</sup>   | 90,7  | -2,12  | 1,26  | 1,32  | -2,01 | -4,99  | NM_002395    | Malic enzyme 1, NADP(+)-dependent, cytosolic                                                                         |
| <i>HERPUD1</i> <sup>1</sup>    | 121.3 | -22.51 | 1.13  | -1.21 | 3.54  | 5.36   | NM_014685    | Homocysteine-inducible, endoplasmic reticulum stress-inducible, ubiquitin-like domain member 1, transcript variant 1 |
| <i>IDH1</i> <sup>4</sup>       | 14.3  | 2.47   | 1.01  | 1.14  | -1.79 | -2.02  | NM_005896    | Isocitrate dehydrogenase 1 (NADP+), soluble                                                                          |
| <i>MT1E</i> <sup>2</sup>       | 208.0 | -3.20  | -1.07 | 1.42  | 2.36  | 2.57   | NM_175617    | Metallothionein 1E                                                                                                   |
| <i>CLPP</i> <sup>2</sup>       | 86.1  | -5.26  | -1.15 | -1.62 | 7.37  | 9.50   | NM_006012    | ClpP caseinolytic peptidase, ATP-dependent, proteolytic subunit homolog (E. coli)                                    |
| <i>SOD1</i> <sup>3</sup>       | 102.9 | -3.47  | -1.24 | 16.87 | -2.07 | -3.05  | NM_000454    | Superoxide dismutase 1, soluble                                                                                      |
| <i>GPX2</i> <sup>2,4,9</sup>   | 851.1 | 1.20   | -1.26 | 1.02  | -3.02 | -3.63  | NM_002083    | Glutathione peroxidase 2 (gastrointestinal)                                                                          |
| <i>STIP1</i> <sup>2</sup>      | 13.2  | -1.42  | -1.29 | 2.05  | -1.41 | -1.71  | NM_006819    | Stress-induced-phosphoprotein 1 (STIP1)                                                                              |
| <i>UNKL</i> <sup>1</sup>       | 157.5 | -1.43  | -1.35 | 1.14  | 1.09  | 1.78   | NM_001193388 | Unkempt homolog (Drosophila)-like, transcript variant 1                                                              |
| <i>GSR</i> <sup>1,2</sup>      | 10.2  | 1.02   | -1.41 | -1.64 | -1.56 | -1.09  | NM_000637    | Glutathione reductase, transcript variant 1                                                                          |
| <i>UBB</i> <sup>2</sup>        | 184.2 | -1.12  | -1.45 | -1.02 | -1.16 | -1.29  | NM_018955    | Ubiquitin B                                                                                                          |
| <i>SQSTM1</i> <sup>1,2,7</sup> | 8.8   | 4.41   | -1.56 | 1.44  | 3.56  | 1.76   | NM_003900    | Sequestosome 1, transcript variant 1                                                                                 |
| <i>RXRA</i> <sup>1</sup>       | 61.4  | -1.97  | -1.59 | -1.53 | -2.05 | -1.90  | NM_002957    | Retinoid X receptor, alpha                                                                                           |
| <i>GSTA3</i> <sup>4,9</sup>    | 75.2  | -2.11  | -1.64 | -1.24 | 1.30  | -1.09  | NM_000847    | Glutathione S-transferase alpha 3                                                                                    |
| <i>GPI</i> <sup>1</sup>        | 529.6 | -12.10 | -1.83 | -3.56 | 1.41  | 1.86   | NM_000175    | Glucose-6-phosphate isomerase, transcript variant 2                                                                  |
| <i>FMO1</i> <sup>2</sup>       | 403.4 | -1.40  | -1.85 | -1.19 | -1.04 | -1.51  | NM_002021    | Flavin containing monooxygenase 1                                                                                    |
| <i>MT1A</i> <sup>2</sup>       | 167.0 | -1.28  | -1.97 | -1.77 | 1.93  | 1.31   | NM_005946    | Metallothionein 1A                                                                                                   |
| <i>ETS1</i> <sup>8,9</sup>     | 10.3  | -1.48  | -2.00 | -1.60 | -1.37 | -1.87  | NM_005238    | V-ets erythroblastosis virus E26 oncogene homolog 1 (avian), transcript variant 2                                    |
| <i>ABCB6</i> <sup>1,2</sup>    | 25.0  | -2.15  | -2.07 | -3.31 | 1.59  | 1.95   | NM_005689    | ATP-binding cassette, sub-family B (MDR/TAP), member 6                                                               |
| <i>HBE1</i> <sup>1</sup>       | 46.5  | -1.48  | -2.08 | -1.48 | 1.34  | -1.19  | NM_005330    | Hemoglobin, epsilon 1                                                                                                |
| <i>FKBP5</i> <sup>2</sup>      | 21.5  | -1.33  | -3.04 | -1.06 | -1.03 | 1.60   | NM_004117    | FK506 binding protein 5, transcript variant 1                                                                        |
| <i>TFE3</i> <sup>1</sup>       | 908.7 | 1.20   | -7.41 | -2.53 | -7.44 | -15.56 | NM_006521    | Transcription factor binding to IGHM enhancer 3                                                                      |
| <b>Group 3</b>                 |       |        |       |       |       |        |              |                                                                                                                      |
| <i>SH3TC1</i> <sup>1</sup>     | 4.0   | 1.02   | 1.48  | 1.17  | -1.05 | -1.03  | NM_018986    | SH3 domain and tetratricopeptide repeats 1                                                                           |
| <i>CBR1</i> <sup>2</sup>       | 4.6   | 2.05   | 1.45  | 1.22  | -3.77 | -3.35  | NM_001757    | Carbonyl reductase 1                                                                                                 |
| <i>NUP62</i> <sup>1</sup>      | 3.8   | 2.34   | 1.39  | 1.01  | 3.90  | 6.82   | NM_153719    | Nucleoporin 62kDa, transcript variant 1                                                                              |
| <i>CAT</i> <sup>2</sup>        | 5.0   | 1.60   | 1.37  | 1.89  | -1.37 | -2.61  | NM_001752    | Catalase                                                                                                             |
| <i>NDUF4F4</i> <sup>1</sup>    | 4.2   | -1.03  | 1.37  | 1.02  | n.d.  | n.d.   | NM_014165    | NADH dehydrogenase (ubiquinone) 1 alpha subcomplex, assembly factor 4                                                |
| <i>CPEB3</i> <sup>1</sup>      | 3.9   | 1.14   | 1.37  | 2.33  | 1.35  | -1.32  | NM_014912    | Cytoplasmic polyadenylation element binding protein 3, transcript variant 1                                          |
| <i>DNAJA1</i> <sup>2,10</sup>  | 12.9  | 1.11   | 1.31  | -1.09 | -1.38 | -1.91  | NM_001539    | Dnaj (Hsp40) homolog, subfamily A, member 1                                                                          |
| <i>HIST1H4H</i> <sup>1</sup>   | 4.0   | 1.10   | 1.30  | 1.06  | 1.50  | -1.22  | NM_003543    | Histone cluster 1, H4h                                                                                               |
| <i>NQO2</i> <sup>5,9</sup>     | 3.8   | -1.05  | 1.29  | 1.09  | 1.19  | 2.31   | NM_000904    | NAD(P)H dehydrogenase, quinone 2                                                                                     |
| <i>PPARGC1B</i> <sup>1</sup>   | 4.1   | 1.05   | 1.29  | 1.05  | 1.42  | 1.43   | NM_133263    | Peroxisome proliferator-activated receptor gamma, coactivator 1 beta, transcript variant 1                           |
| <i>RBX1</i> <sup>5</sup>       | 5.2   | 2.04   | 1.23  | 1.13  | -1.53 | -1.26  | NM_014248    | Ring-box 1, E3 ubiquitin protein ligase                                                                              |
| <i>GCLC</i> <sup>1,2,4,9</sup> | 3.8   | 1.02   | 1.20  | 1.09  | 6.80  | 6.03   | NM_001498    | Glutamate-cysteine ligase, catalytic subunit, transcript variant 1                                                   |

|                                    |      |       |       |       |        |       |              |                                                                                           |
|------------------------------------|------|-------|-------|-------|--------|-------|--------------|-------------------------------------------------------------------------------------------|
| <i>GSTA5</i> <sup>4</sup>          | 3.7  | 1.21  | 1.19  | 1.03  | -3.79  | -4.13 | NM_153699    | Glutathione S-transferase alpha 5                                                         |
| <i>CPEB2</i> <sup>1</sup>          | 5.2  | -1.07 | 1.17  | -1.11 | 1.17   | -1.41 | NM_182485    | Cytoplasmic polyadenylation element binding protein 2, transcript variant B               |
| <i>TKT</i> <sup>1</sup>            | 4.1  | -1.01 | 1.16  | -1.03 | 9.48   | 13.50 | NM_001064    | Transketolase, transcript variant 1                                                       |
| <i>G6PD</i> <sup>4</sup>           | 5.7  | -1.36 | 1.12  | -1.35 | 1.63   | -1.57 | NM_000402    | Glucose-6-phosphate dehydrogenase, transcript variant 1                                   |
| <i>AIFM2</i> <sup>1</sup>          | 8.2  | -1.18 | 1.10  | -1.13 | 1.79   | 1.55  | NM_032797    | Apoptosis-inducing factor, mitochondrion-associated, transcript variant 2                 |
| <i>UNKL</i> <sup>1</sup>           | 4.1  | 1.08  | 1.08  | 1.23  | n.d.   | n.d.  | NM_023076    | Unkempt homolog (Drosophila)-like, transcript variant 3                                   |
| <i>GSTA1</i> <sup>4,9</sup>        | 3.8  | 1.18  | 1.07  | 1.07  | 1.44   | -1.33 | NM_145740    | Glutathione S-transferase alpha                                                           |
| <i>PIR</i> <sup>1</sup>            | 3.6  | -1.01 | 1.06  | 1.40  | 515.60 | 2.92  | NM_003662    | Pirin (iron-binding nuclear protein), transcript variant 1                                |
| <i>GPD2</i> <sup>1</sup>           | 4.2  | 1.20  | 1.05  | 1.08  | 1.39   | 1.46  | NM_000408    | Glycerol-3-phosphate dehydrogenase 2 (mitochondrial), transcript variant 2                |
| <i>PTPLAD1</i> <sup>1</sup>        | 3.7  | 1.12  | 1.04  | 1.05  | 1.57   | 3.23  | NM_016395    | Protein tyrosine phosphatase-like A domain containing 1                                   |
| <i>PIIB</i> <sup>2</sup>           | 3.7  | 1.25  | 1.04  | 1.19  | -1.21  | -1.22 | NM_000942    | Peptidylprolyl isomerase B (cyclophilin B)                                                |
| <i>GCLM</i> <sup>2,4,7</sup>       | 5.9  | -1.12 | 1.03  | -1.26 | 1.06   | -1.33 | NM_002061    | Glutamate-cysteine ligase, modifier subunit                                               |
| <i>NQO1</i> <sup>1,2,3,4,5,7</sup> | 3.7  | 1.11  | 1.01  | 1.10  | -2.51  | -1.95 | NM_000903    | NAD(P)H dehydrogenase, quinone 1, transcript variant 1                                    |
| <i>TXNRD1</i> <sup>1,4,7,9</sup>   | 3.9  | -1.02 | 1.01  | -1.01 | 1.70   | 2.32  | NM_003330    | Thioredoxin reductase 1, transcript variant 1                                             |
| <i>HTATIP2</i> <sup>1</sup>        | 3.9  | -1.05 | 1.01  | -1.01 | -1.31  | -2.61 | NM_001098523 | HIV-1 Tat interactive protein 2, 30kDa, transcript variant 5                              |
| <i>CUL3</i> <sup>5</sup>           | 4.2  | 1.20  | -1.00 | 1.08  | 1.53   | 2.27  | NM_003590    | Cullin 3                                                                                  |
| <i>BACH1</i> <sup>6</sup>          | 4.8  | 1.07  | -1.04 | -1.08 | -3.11  | -3.42 | NR_027655    | BTB and CNC homology 1, basic leucine zipper transcription factor 1, transcript variant 3 |
| <i>tAKR</i> <sup>2</sup>           | 4.5  | 1.07  | -1.05 | 1.03  | -2.16  | -2.10 | NR_026743    | Aldo-keto reductase, truncated                                                            |
| <i>KEAP1</i> <sup>1,5,7</sup>      | 4.5  | -1.04 | -1.08 | -1.10 | 3.31   | 2.37  | NM_203500    | Kelch-like ECH-associated protein 1, transcript variant 1                                 |
| <i>PSMA3</i> <sup>1</sup>          | 4.1  | -1.13 | -1.12 | -1.18 | 2.27   | 3.17  | NM_148976    | Proteasome (prosome, macropain) subunit, alpha type, 1, transcript variant 1              |
| <i>GSTA2</i> <sup>4</sup>          | 5.5  | -1.23 | -1.34 | -1.28 | -2.19  | -2.67 | NM_000846    | Glutathione S-transferase alpha 2                                                         |
| <i>GSR</i> <sup>1,4,7</sup>        | 10.2 | 1.02  | -1.41 | -1.64 | -1.56  | -1.09 | NM_000637    | Glutathione reductase, transcript variant 1                                               |
| <i>AOX1</i> <sup>2</sup>           | 5.9  | 1.11  | -1.41 | 1.16  | 1.24   | 1.49  | NM_001159    | Aldehyde oxidase 1                                                                        |
| <i>PPARGC1A</i> <sup>11</sup>      | 5.6  | 1.01  | -1.46 | -1.26 | -1.80  | -1.80 | NM_013261    | Peroxisome proliferator-activated receptor gamma, coactivator 1 alpha                     |
| <i>HTATIP2</i> <sup>1</sup>        | 6.6  | 1.04  | -1.63 | -1.31 | -1.15  | -1.07 | NM_006410    | HIV-1 Tat interactive protein 2, 30kDa, transcript variant 2                              |
| <i>EPHX1</i> <sup>1,7</sup>        | 7.0  | -1.57 | -1.82 | -1.59 | -2.29  | -1.50 | NM_000120    | Epoxide hydrolase 1, microsomal (xenobiotic), transcript variant 1                        |

The first column of the table gives the official gene symbols. Additionally, the respective literature is referenced in superscript numbers. In the second column, the mean basal expression levels within the normal white matter of control cases is depicted. The following three columns show the calculated gene expression fold-changes within the periplaque white matter (PP), initial (prephagocytic) lesions (I) and active demyelinating lesions (A) in comparison with the normal white matter of controls. Thereafter, the calculated gene expression fold-changes within active cortical lesions from all three evaluated MS cases (All) or a single MS case (MS15) in comparison with the normal grey matter of control cases are shown.

The Nrf2-responsive genes are categorized according to their basal expression in the NWM of controls and expression fold-changes in MS lesions in comparison with the respective control tissue. **Group 1** represents Nrf2-responsive genes that show a low basal expression in the NWM of controls, but were up-regulated in the zones of initial demyelination, while their expression was lower in the NAWM and the demyelinated part of the active lesion. The second pattern (**Group**

2) consists of genes, which are expressed in high levels in the NWM of controls. Genes within **group 3** show a very low basal expression in the NWM of controls and do not show any dynamic expression changes in MS lesions.

## **Supplementary References:**

- 1 Chorley BN, Campbell MR, Wang X, Karaca M, Sambandan D, Bangura F, Xue P, Pi J, Kleeberger SR, Bell DA. Identification of novel NRF2-regulated genes by ChIP-Seq: influence on retinoid X receptor alpha. *Nucleic Acids Res.* 2012 Aug;40(15):7416-29. doi: 10.1093/nar/gks409. Epub 2012 May 11.
- 2 Córdova EJ, Martínez-Hernández A, Uribe-Figueroa L, Centeno F, Morales-Marín M<sup>2</sup>, Koneru H, Coleman MA, Orozco L. The NRF2-KEAP1 pathway is an early responsive gene network in arsenic exposed lymphoblastoid cells. *PLoS One.* 2014 Feb 7;9(2):e88069. doi: 10.1371/journal.pone.0088069. eCollection 2014.
- 3 Taylor RC, Acquah-Mensah G, Singhal M, Malhotra D, Biswal S. Network inference algorithms elucidate Nrf2 regulation of mouse lung oxidative stress. *PLoS Comput Biol.* 2008 Aug 29;4(8):e1000166. doi: 10.1371/journal.pcbi.1000166.
- 4 Gorrini C, Harris IS, Mak TW. Modulation of oxidative stress as an anticancer strategy. *Nat Rev Drug Discov.* 2013 Dec;12(12):931-47. doi: 10.1038/nrd4002.
- 5 Niture SK, Khatri R, Jaiswal AK. Regulation of Nrf2-an update. *Free Radic Biol Med.* 2014 Jan;66:36-44. doi: 10.1016/j.freeradbiomed.2013.02.008. Epub 2013 Feb 19.
- 6 Jyrkkänen HK, Kuosmanen S, Heinäniemi M, Laitinen H, Kansanen E, Mella-Aho E, Leinonen H, Ylä-Herttuala S, Levonen AL. Novel insights into the regulation of antioxidant-response-element-mediated gene expression by electrophiles: induction of the transcriptional repressor BACH1 by Nrf2. *Biochem J.* 2011 Dec 1;440(2):167-74. doi: 10.1042/BJ20110526.
- 7 Cook AL, Vitale AM, Ravishankar S, Matigian N, Sutherland GT, Shan J, Sutharsan R, Perry C, Silburn PA, Mellick GD, Whitelaw ML, Wells CA, Mackay-Sim A, Wood SA. NRF2 activation restores disease related metabolic deficiencies in olfactory neurosphere-derived cells from patients with sporadic Parkinson's disease. *PLoS One.* 2011;6(7):e21907. doi: 10.1371/journal.pone.0021907. Epub 2011 Jul 1.
- 8 Wilson LA, Gemin A, Espiritu R, Singh G. ets-1 is transcriptionally up-regulated by H<sub>2</sub>O<sub>2</sub> via an antioxidant response element. *FASEB J.* 2005 Dec;19(14):2085-7. Epub 2005 Oct 18.
- 9 Malhotra D, Portales-Casamar E, Singh A, Srivastava S, Arenillas D, Happel C, Shyr C, Wakabayashi N, Kensler TW, Wasserman WW, Biswal S. Global mapping of binding sites for Nrf2 identifies novel targets in cell survival response through ChIP-Seq profiling and network analysis. *Nucleic Acids Res.* 2010 Sep;38(17):5718-34. doi: 10.1093/nar/gkq212. Epub 2010 May 11.
- 10 Thimmulappa RK, Mai KH, Srisuma S, Kensler TW, Yamamoto M, Biswal S. Identification of Nrf2-regulated genes induced by the chemopreventive agent sulforaphane by oligonucleotide microarray. *Cancer Res.* 2002 Sep 15;62(18):5196-203.
- 11 Whitman SA, Long M, Wondrak GT, Zheng H, Zhang DD. Nrf2 modulates contractile and metabolic properties of skeletal muscle in streptozotocin-induced diabetic atrophy. *Exp Cell Res.* 2013 Oct 15;319(17):2673-83. doi: 10.1016/j.yexcr.2013.07.015. Epub 2013 Jul 27.
